# Supplementary material for: When the Going Gets Challenging—Motivational Theories as a Driver for Workplace Health Promotion, Employees Well-Being and Quality of Life
Source: MDPI journal article supplement (doi:10.3390/bs13110898), 2023-10-30
Supplement: s1 [file s1]

Table S1: Overview of reviewed articles

| No | Reference             | Title                                                                                                                        | Country | Motivational theory considered                                                                                                                                                                                                                                                                                                                                                        | Research approach                                              | Population                              | Findings/Goal                                                                                                                                                                                                 |
|----|-----------------------|------------------------------------------------------------------------------------------------------------------------------|---------|---------------------------------------------------------------------------------------------------------------------------------------------------------------------------------------------------------------------------------------------------------------------------------------------------------------------------------------------------------------------------------------|----------------------------------------------------------------|-----------------------------------------|---------------------------------------------------------------------------------------------------------------------------------------------------------------------------------------------------------------|
| 1  | Jodai et al (2013)    | Motivation, Integrativeness, Organizational Influence, Anxiety, and English Achievement: Evidence from a Military University | Iran    | Cognitive                                                                                                                                                                                                                                                                                                                                                                             | Methodological using the mini-Attitude Motivation Test Battery | Iranian military staff (n= 164)         | Finding: Motivation is positive factor in achievement of a goal                                                                                                                                               |
| 2  | Kispál-Vitai (2016)   | Comparative analysis of motivation theories. International Journal of Engineering and Management Sciences                    | Hungary | General psychology:<br><ul style="list-style-type: none"> <li>• Hedonism</li> <li>• Instincts</li> <li>• Drive reduction</li> <li>• Arousal</li> <li>• Incentive</li> <li>• Cognitive</li> <li>• Maslow's hierarchy of needs</li> </ul> Work psychology:<br><ul style="list-style-type: none"> <li>• Early</li> <li>• Content</li> <li>• Learning based</li> <li>• Process</li> </ul> | Theoretical<br><br>Comparative analysis                        | /                                       | Finding: multidisciplinary research (general/work psychology/ clinical neuropsychology)creates new results crucial for practicing managers in designing effective motivational strategies for their employees |
| 3  | Steers et al (2004)   | The future of work motivation theory                                                                                         | USA     | Classical theories and adaptations of the 21st century                                                                                                                                                                                                                                                                                                                                | Review                                                         | /                                       | Finding: Future of work motivation lies in adaptation of the classical theories to make them fit into todays world                                                                                            |
| 4  | Korenčić-Kampl (1996) | Survey about the motivation for the study of veterinary medicine in Croatia                                                  | Croatia | Factors affecting motivation                                                                                                                                                                                                                                                                                                                                                          | Methodological                                                 | First Year veterinary medicine students | Findings: candidates for the veterinary profession are motivated through direct affection to the profession and the love to animals                                                                           |

|    |                   |                                                                               |              |                                                                                                                                                                |             |   |                                                                                                                                                       |
|----|-------------------|-------------------------------------------------------------------------------|--------------|----------------------------------------------------------------------------------------------------------------------------------------------------------------|-------------|---|-------------------------------------------------------------------------------------------------------------------------------------------------------|
| 5  | Brown (2007)      | Psychology of motivation                                                      | USA          | <ul style="list-style-type: none"> <li>• Drive reduction</li> <li>• Incentive</li> <li>• Intrinsic/extrinsic</li> <li>• Maslow's hierarchy of needs</li> </ul> | Theoretical | / | Goal: to assist the reader to understand and appreciate the complex issue of human motivated behaviors                                                |
| 6  | Young (1936)      | Psychological hedonism                                                        | USA          | Hedonism                                                                                                                                                       | Theoretical | / | Goal: investigating hedonism as a motivator of behavior                                                                                               |
| 7  | McAllister (1953) | Toward a re-examination of psychological hedonism                             | USA          | Hedonism                                                                                                                                                       | Theoretical | / | Finding: psychoclogical hedonism still remains a topic for future studies                                                                             |
| 8  | Garson (2016)     | Two types of psychological hedonism                                           | USA          | Hedonism                                                                                                                                                       | Theoretical | / | Goal: distinguish two different forms of hedonism<br>Finding: a careful analysis of the different forms can provide a useful framework for the future |
| 9  | Williams (2018)   | Psychological hedonism, hedonic motivation, and health behavior               | USA          | Hedonism                                                                                                                                                       | Theoretical | / | Goal: offering a new way of thinking about hedonism, updated based on recent theory an research in neuroscience and psychology                        |
| 10 | McDougall (1908)  | The gregarious instinct                                                       | USA          | Instincts                                                                                                                                                      | Theoretical | / | Finding: in a highly civilized society instincts are less important                                                                                   |
| 11 | Shrestha (2017)   | Instinct Theory of Motivation                                                 | Japan        | Instincts                                                                                                                                                      | Theoretical | / | Goal: brief overview of the theory and critical evaluation of it in todays world                                                                      |
| 12 | Hull (1943)       | Principles of behavior                                                        | USA          | Drive reduction                                                                                                                                                | Theoretical | / | Goal: explaining human behavior                                                                                                                       |
| 13 | Wolpe (1950)      | Need-reduction, drive-reduction, and reinforcement: a neurophysiological view | South Africa | Drive reduction                                                                                                                                                | Review      | / | Goal: evaluation drive reduction from a neurophysiological view                                                                                       |

|    |                   |                                                              |             |                 |                |                                                      |                                                                                                                     |
|----|-------------------|--------------------------------------------------------------|-------------|-----------------|----------------|------------------------------------------------------|---------------------------------------------------------------------------------------------------------------------|
| 14 | Seward (1956)     | Drive, incentive, and reinforcement.                         | USA         | Drive reduction | Review         | /                                                    | Goal: investigating drive reduction theory in reinforcement                                                         |
| 15 | Stennett (1957)   | The relationship of performance level to level of arousal    | Canada      | Arousal         | Methodological | Male students (n=31)                                 | Finding: an inverted-U relationship exists between the level of arousal and performance level                       |
| 16 | Reisenzein (1994) | Pleasure-arousal theory and the intensity of emotions        | Germany     | Arousal         | Methodological | Psychology students (n=35 in part 1; n=56 in part 2) | Finding: arousal and the intensity of emotions needs further investigation and can not be generalized               |
| 17 | Heckhausen (2013) | The anatomy of achievement motivation                        | Germany     | Several         | Theoretical    | /                                                    | Goal: Overview of motivation                                                                                        |
| 18 | Shrestha (2017)   | Arousal Theory of Motivation                                 | Japan       | Arousal         | Theoretical    | /                                                    | Goal: brief overview of the theory and the Yerkes-Dodson Law and critical evaluation of it in today's world         |
| 19 | Tolman (1952)     | A cognition motivation model                                 | USA         | Cognitive       | Theoretical    | /                                                    | Goal: development of a cognitive motivation model                                                                   |
| 20 | Piaget (1964)     | Cognitive development in children                            | Switzerland | Cognitive       | Theoretical    | /                                                    | Goal: overview of cognitive development                                                                             |
| 21 | Dermer (1975)     | The interrelationship of intrinsic and extrinsic motivation. | USA         | Cognitive       | Methodological | Store managers (n=81)                                | Goal: investigating interrelationship between intrinsic/extrinsic motivation                                        |
| 22 | Pinder (2014)     | Work motivation in organizational behavior                   | USA         | Several         | Theoretical    | /                                                    | Goal: overview of development of work motivation theories, concepts of work motivation and determinants of behavior |

|    |                     |                                                                                |        |           |                |                                                              |                                                                                                                                                                                                                     |
|----|---------------------|--------------------------------------------------------------------------------|--------|-----------|----------------|--------------------------------------------------------------|---------------------------------------------------------------------------------------------------------------------------------------------------------------------------------------------------------------------|
| 23 | Kuvaas et al (2017) | Do intrinsic and extrinsic motivation relate differently to employee outcomes? | Norway | Cognitive | Methodological | Employees (n=557) and store managers (n=106) of gas stations | Findings: intrinsic motivation is associated with positive outcomes. Extrinsic motivation is negatively related/unrelated to positive outcomes. Intrinsic/extrinsic motivation are moderately negatively correlated |
|----|---------------------|--------------------------------------------------------------------------------|--------|-----------|----------------|--------------------------------------------------------------|---------------------------------------------------------------------------------------------------------------------------------------------------------------------------------------------------------------------|

| No | Reference        | Title                                                                                   | Country | Motivational theory considered                                                                                                             | Research approach | Population | Findings/Goal                                                                                                                                                                 |
|----|------------------|-----------------------------------------------------------------------------------------|---------|--------------------------------------------------------------------------------------------------------------------------------------------|-------------------|------------|-------------------------------------------------------------------------------------------------------------------------------------------------------------------------------|
| 24 | Turner (2017)    | How does intrinsic and extrinsic motivation drive performance culture in organizations? | USA     | Cognitive                                                                                                                                  | Review            |            | Findings: there is a mixed approach in whether employee's motivation is intrinsic or extrinsic. The type of motivation is also based on one's role within their organization. |
| 25 | Legault (2016)   | Intrinsic and extrinsic motivation                                                      | USA     | Cognitive                                                                                                                                  | Theoretical       | /          | Goal: Overview of intrinsic/extrinsic motivation in today's world                                                                                                             |
| 26 | Mullins (2007)   | Management and organisational behavior                                                  | UK      | Several                                                                                                                                    | Theoretical       | /          | Goal: overview of management and organizational behavior in today's world                                                                                                     |
| 27 | Dinibutun (2012) | Work motivation: Theoretical framework                                                  | Turky   | Content theories:<br>• Maslow,<br>• Alderfer,<br>• McClelland<br>• Herzberg<br>Process theories:<br>• equity theory<br>• expectancy theory | Theoretical       | /          | Goal: exploring different theories of motivation, and presenting motivation as a basic psychological process                                                                  |
| 28 | Maslow (1954)    | Motivation and Personality                                                              | USA     | Maslow's hierarchy of needs                                                                                                                | Theoretical       | /          | Goal: introduction of a new theory                                                                                                                                            |

|    |                    |                                                                                           |          |                                                                                                                                                                                                                                                                                                |             |   |                                                                                                                                                                                    |
|----|--------------------|-------------------------------------------------------------------------------------------|----------|------------------------------------------------------------------------------------------------------------------------------------------------------------------------------------------------------------------------------------------------------------------------------------------------|-------------|---|------------------------------------------------------------------------------------------------------------------------------------------------------------------------------------|
| 29 | Ball (2012)        | A summary of motivation theories                                                          | Germany  | <ul style="list-style-type: none"> <li>• Maslow's hierarchy of need</li> <li>• Alderfer's ERG</li> <li>• McClelland's Achievement</li> <li>• Adam's Equity</li> <li>• Herzberg's two factor</li> <li>• Vroom's expectancy</li> <li>• Hackman&amp;Oldham's Job Characteristics Model</li> </ul> | Theoretical | / | Goal: overview of the motivation theories and their use in today's world                                                                                                           |
| 30 | Mangi et al (2015) | Motivation tools and organizational success: A critical analysis of motivational theories | Pakistan | <ul style="list-style-type: none"> <li>• Maslow's hierarchy of needs</li> <li>• Herzberg's 2 factor theory</li> <li>• Vroom's expectancy theory</li> <li>• Alderfer's ERG theory</li> </ul>                                                                                                    | Review      | / | Goal: Dynamic view of motivation and its impact on the organizational achievement. Discussion of major issues and emphases of recent work that opens new basis to further research |
| 31 | Alderfer (1972)    | Existence, relatedness, and growth: Human needs in organizational settings                | USA      | Alderfer's ERG theory                                                                                                                                                                                                                                                                          | Theoretical | / | Goal: introduction to the ERG theory                                                                                                                                               |

|    |                        |                                                                                    |           |                               |             |   |                                                                                                                                                                                                                                                                               |
|----|------------------------|------------------------------------------------------------------------------------|-----------|-------------------------------|-------------|---|-------------------------------------------------------------------------------------------------------------------------------------------------------------------------------------------------------------------------------------------------------------------------------|
| 32 | Stello (2011)          | Herzberg's two-factor theory of job satisfaction: An integrative literature review | USA       | Herzberg's 2 factory theory   | Review      | / | Finding: it stands the time, integrates itself into basic points of view about management, and continues to provide ideas for new generations of scholars. It has proven its value.                                                                                           |
| 33 | Alshmemri et al (2017) | Herzberg's two-factor theory                                                       | Australia | Herzberg's 2 factory theory   | Review      | / | Findings: The results support Herzberg's theory and assert that the hygiene factors are less important to job satisfaction; the motivation factors are most important and can lead to job satisfaction. The theory identifies and explains the phenomena of job satisfaction. |
| 34 | Herzberg (1966)        | Work and the Nature of Man                                                         | USA       | Herzberg's 2 factory theory   | Theoretical | / | Goal: Introduction to the 2-factor theory                                                                                                                                                                                                                                     |
| 35 | McClelland (1961)      | Achieving society                                                                  | USA       | achievement motivation theory | Theoretical | / | Goal: Introduction to the achievement motivation theory                                                                                                                                                                                                                       |

|    |                          |                                                                                                                                                       |        |                                                                                                                            |             |   |                                                                                                                                                                                           |
|----|--------------------------|-------------------------------------------------------------------------------------------------------------------------------------------------------|--------|----------------------------------------------------------------------------------------------------------------------------|-------------|---|-------------------------------------------------------------------------------------------------------------------------------------------------------------------------------------------|
| 36 | Pardee (1990)            | Motivation Theories of Maslow, Herzberg, McGregor & McClelland. A Literature Review of Selected Theories Dealing with Job Satisfaction and Motivation | USA    | <ul style="list-style-type: none"> <li>• Maslow,</li> <li>• Herzberg,</li> <li>• McGregor</li> <li>• McClelland</li> </ul> | Review      | / | Findings: Managers incorporating motivational elements in work settings rather than simply eliminating adverse hygiene factors, they can expect higher productivity and job satisfaction. |
| 37 | Vroom (1964)             | Work and motivation                                                                                                                                   | Canada | Expectancy theorie                                                                                                         | Theoretical | / | Goal: Introduction to the expectancy theory                                                                                                                                               |
| 38 | Porter and Lawler (1968) | Managerial attitudes and performance                                                                                                                  | USA    | Expectancy theorie                                                                                                         | Theoretical | / | Goal: expanding the expectancy theory                                                                                                                                                     |
| 39 | Adams (1963)             | Towards an understanding of inequity                                                                                                                  | USA    | Equity theory                                                                                                              | Theoretical | / | Goal: Introduction to the equity theory                                                                                                                                                   |
| 40 | Locke (1968)             | Toward a theory of task motivation and incentives                                                                                                     | USA    | Goal setting theory                                                                                                        | Theoretical | / | Goal: introduction to the goal setting theory                                                                                                                                             |
| 41 | Heider (1958)            | The Psychology of Interpersonal Relations                                                                                                             | USA    | Attribution theory                                                                                                         | Theoretical | / | Goal: introduction to the attribution theory                                                                                                                                              |
| 42 | Kelley (1973)            | The processes of causal attribution                                                                                                                   | USA    | Attribution theory                                                                                                         | Theoretical | / | Goal: introduction to the attribution theory                                                                                                                                              |



|    |                         |                                                                                                            |        |                                                   |                |                                                                   |                                                                                                                                                                                                                                               |
|----|-------------------------|------------------------------------------------------------------------------------------------------------|--------|---------------------------------------------------|----------------|-------------------------------------------------------------------|-----------------------------------------------------------------------------------------------------------------------------------------------------------------------------------------------------------------------------------------------|
| 43 | Ganta (2014)            | Motivation in the workplace to improve the employee performance                                            | India  | Cognitive<br>Maslow's theory<br>Herzberg's theory | Review         | /                                                                 | Goal: to emphasize the importance of motivation in the workplace/to improve the employee performance and productivity/to present the theories and techniques of the motivation in the workplace                                               |
| 44 | Yerkes and Dodson(1908) | The relation of strength of stimulus to rapidity of habit-formation                                        | Canada | Yerke-Dodson law<br>Arousal theory                | Methodological | Mice (n=40)                                                       | Goal: experiments and introduction to the Yerke-Dodson law                                                                                                                                                                                    |
| 45 | Ryan (2000)             | Self-determination theory and the facilitation of intrinsic motivation, social development, and well-being | USA    | Cognitive                                         | Theoretical    | /                                                                 | Findings: intrinsic motivation supports psychological well-being more than extrinsic motivation                                                                                                                                               |
| 46 | Karasek (1979)          | Job demands, job decision latitude, and mental strain: Implications for job redesign                       | USA    | General                                           | Methodological | National surveys from Sweden and the USA evaluation stress models | Goal: redesigning work processes to allow increases in decision latitude for a broad range of workers to reduce mental strain and do so without affecting the job demands that may plausibly be associated with organizational output levels. |

|    |                 |                                                                                                |     |           |             |   |                                                                                                                                                                                                                                                                                                                                                                                                                  |
|----|-----------------|------------------------------------------------------------------------------------------------|-----|-----------|-------------|---|------------------------------------------------------------------------------------------------------------------------------------------------------------------------------------------------------------------------------------------------------------------------------------------------------------------------------------------------------------------------------------------------------------------|
| 47 | Meyer (1997)    | Commitment in the workplace: Theory, research, and application                                 | UK  | General   | Review      | / | Goal: Give an overview over available research regarding commitment to the workplace                                                                                                                                                                                                                                                                                                                             |
| 48 | Mackay (1987)   | Occupational stress and health. International review of industrial and organization psychology | UK  | General   | Review      | / | Goal: Give an overview on international research regarding steps and health in the workplace                                                                                                                                                                                                                                                                                                                     |
| 49 | Lazarus (1995)  | Psychological stress in the workplace                                                          | USA | General   | Theoretical | / | Goal: describing the current theoretical perspectives and empirical work in occupational stress                                                                                                                                                                                                                                                                                                                  |
| 50 | Driscoll (2022) | Credentialed veterinary technician intrinsic and extrinsic rewards: a narrative review         | USA | Cognitive | Review      | / | Goal: provide an economic overview of the veterinary technician profession based on intrinsic and extrinsic rewards<br>Finding: veterinary technician intrinsic and extrinsic rewards are complex; changes to the profession, such as increasing veterinary technician utilization, should simultaneously incorporate the economic needs and values of veterinary technicians and veterinary practice operators. |

|    |                     |                                                                                                                  |     |           |                |                                                                         |                                                                                                                                                                                                                                                                                                                                                                                                                |
|----|---------------------|------------------------------------------------------------------------------------------------------------------|-----|-----------|----------------|-------------------------------------------------------------------------|----------------------------------------------------------------------------------------------------------------------------------------------------------------------------------------------------------------------------------------------------------------------------------------------------------------------------------------------------------------------------------------------------------------|
| 51 | Wynia (2009)        | The risks of rewards in health care: How pay-for-performance could threaten, or bolster, medical professionalism | USA | General   | Theoretical    | /                                                                       | Finding: profession has to assert its responsibility for determining how to define, measure and reward for quality—then pay-for-performance can promote not only high-quality care, but other core professional values too, including professional autonomy, collegial oversight and self-regulation.                                                                                                          |
| 52 | Iglehart (2013)     | Expanding the role of advanced nurse practitioners—risks and rewards                                             | USA | Cognitive | Theoretical    | /                                                                       | Goal: discussing possibilities to address the nursing shortage in the US                                                                                                                                                                                                                                                                                                                                       |
| 53 | Morgan et al (2013) | The quality of healthcare jobs: can intrinsic rewards compensate for low extrinsic rewards?                      | USA | Cognitive | Methodological | Front line workers in 25 health care organizations in the USA (n= 1006) | Goal: examines the influence of extrinsic job characteristics (e.g. wages and benefits) versus intrinsic characteristics (e.g. meaningful tasks) on job satisfaction and intent to stay with one's current employer<br>Finding: both intrinsic and extrinsic characteristics are significant predictors of job satisfaction, but only extrinsic characteristics help explain intent to stay with the employer. |

|    |                         |                                                                                |              |           |                |                                                                                  |                                                                                                                                                                                                                                                                                                             |
|----|-------------------------|--------------------------------------------------------------------------------|--------------|-----------|----------------|----------------------------------------------------------------------------------|-------------------------------------------------------------------------------------------------------------------------------------------------------------------------------------------------------------------------------------------------------------------------------------------------------------|
| 54 | Ganster at al (2013)    | Performance-based rewards and work stress.                                     | UK           | Cognitive | Review         | /                                                                                | <p>Goal: linking performance-based reward systems to various indicators of employee stress and well-being.</p> <p>Findings: reward systems generally deserve much more attention in the work stress literature</p>                                                                                          |
| 55 | Victor and Hoole (2017) | The influence of organisational rewards on workplace trust and work engagement | South Africa | Cognitive | Methodological | South African employees in various industries within the Gauteng region (n= 251) | <p>Goal: to determine the relationship between rewards, trust and engagement, and to investigate if rewards are able to predict trust and engagement</p> <p>Findings: moderate-to-strong positive relationship between the three constructs, and that rewards are able to predict trust and engagement.</p> |
| 56 | Triffin (1979)          | Industrial Psychology                                                          | USA          | General   | Theoretical    | /                                                                                | <p>Goal: overview of organizational and social context of human work</p>                                                                                                                                                                                                                                    |

|    |                    |                                                                               |                                  |                                          |                |                                                         |                                                                                                                                                                                                                                                                                                      |
|----|--------------------|-------------------------------------------------------------------------------|----------------------------------|------------------------------------------|----------------|---------------------------------------------------------|------------------------------------------------------------------------------------------------------------------------------------------------------------------------------------------------------------------------------------------------------------------------------------------------------|
| 57 | Kacel et al (2005) | Measurement of nurse practitioner job satisfaction in a Midwestern state      | USA                              | General                                  | Methodological | Randomized sample of licensed nurses (n= 147)           | Goal: To describe the current level of job satisfaction of nurse practitioners<br>Findings: Population was minimally satisfied to satisfied: most satisfied with intrinsic factors and least satisfied with extrinsic factors of the job                                                             |
| 58 | Lephalala (2006)   | Factors influencing nursing turnover in selected private hospitals in England | South Africa (author)/UK (study) | Herzberg's 2 factory theory<br>Cognitive | Methodological | Nurses in selected private hospitals in England (n= 85) | Findings: turnover rates might be reduced if promotion policies could be consistent, doctors would value nurses' work and if nurses could be more autonomous. Enhanced communication about policies and about accessing information and improved salaries could contribute to reduced turnover rates |

|    |                               |                                                                                        |                                   |                              |                |                                                           |                                                                                                                                                                                                                                                                                                                          |
|----|-------------------------------|----------------------------------------------------------------------------------------|-----------------------------------|------------------------------|----------------|-----------------------------------------------------------|--------------------------------------------------------------------------------------------------------------------------------------------------------------------------------------------------------------------------------------------------------------------------------------------------------------------------|
| 59 | Mitchell (2009)               | Job satisfaction and burnout among foreign-trained nurses in Saudi Arabia              | Saudi Arabia (study)/USA (author) | Herzberg's 2 factory theory  | Methodological | Saudi Arabian nurses with international training (n= 453) | Findings: motivators work recognition, salary, working conditions, accomplishment, corporate policy and administration, and connections with managers and coworkers; employment discontentment: business policy and administration, working circumstances, status, supervisor relationships, security, and personal life |
| 60 | Osemeke and Adegboyega (2017) | Critical review and comparism between Maslow, Herzberg and McClellands theory of needs | Nigeria                           | Maslow, Herzberg, McClelland | Review         | /                                                         | Findings: organizations should endeavor to adopt McClelland's theory to motivate their employees                                                                                                                                                                                                                         |
| 61 | Slocum and Hellriegel (2009)  | Principles of organizational behavior                                                  | USA                               | Several                      | Theoretical    | /                                                         | Goal: provide a holistic understanding of management in today's business world.                                                                                                                                                                                                                                          |
| 62 | Van Dierendonck et al (1994)  | Burnout among general practitioners: a perspective from equity theory                  | The Netherlands                   | Equity theory                | Methodological | General practitioners (n= 567)                            | Findings: equity theory enhances understanding of the relationship between practitioner and patient as a determinant of burnout                                                                                                                                                                                          |

|    |                  |                                                                                                             |      |                     |                |                                                                                             |                                                                                                                            |
|----|------------------|-------------------------------------------------------------------------------------------------------------|------|---------------------|----------------|---------------------------------------------------------------------------------------------|----------------------------------------------------------------------------------------------------------------------------|
| 63 | Habibipour (200) | The effect of implementing “Goal Setting Theory” by nurse managers on staff nurses’ job motivation          | Iran | Goal setting theory | Methodological | Nurses from one Nigerian hospital (n= 30 experimental population; n= 21 control population) | Findings: Implementing the “goal setting theory” resulted in a higher level of job motivation in staff nurse in this study |
| 64 | Weiner (2004)    | Social motivation and moral emotions’. Attribution theory in the organizational sciences                    | USA  | Attribution theory  | Theoretical    | /                                                                                           | Goal: Overview of attribution theory in today's organizational world                                                       |
| 65 | Weiner (2008)    | Reflections on the history of attribution theory and research: People, personalities, publications, problem | USA  | Attribution theory  | Theoretical    | /                                                                                           | Goal: Overview of attribution theory in today's organizational world                                                       |
